# Supplementary material for: Assessing the Bacterial Community Composition of Bivalve Mollusks Collected in Aquaculture Farms and Respective Susceptibility to Antibiotics
Source: MDPI journal article supplement (doi:10.3390/antibiotics10091135), 2021-09-20
Supplement: s1 [file s1]

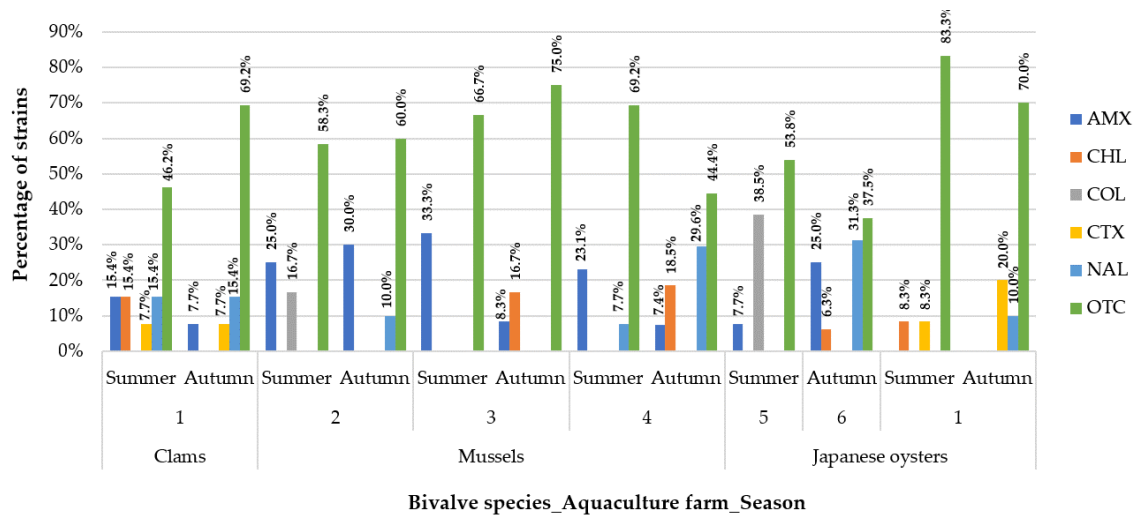

**Figure S1.** Decreased susceptibilities found in bivalves samples. These results were obtained through the initial screening with selective media containing antibiotics and do not include known intrinsic resistances. AMX: amoxicillin; CHL: chloramphenicol; COL: colistin; CTX: cefotaxime; NAL: nalidixic acid; OTC: oxytetracycline.

**Table S1.** Distribution of bacterial families among the six aquaculture farms in Summer and Autumn.

[illegible]

**Table S2.** Percentage of strains with decreased susceptibility to antibiotics used in the initial screening.

| Bivalve species  | Aquaculture farm | Season | Decreased susceptibility |       |       |       |       |       |
|------------------|------------------|--------|--------------------------|-------|-------|-------|-------|-------|
|                  |                  |        | AMX                      | CHL   | COL   | CTX   | NAL   | OTC   |
| Clams            | 1                | Summer | 15.4%                    | 15.4% | 0%    | 7.7%  | 15.4% | 46.2% |
|                  |                  | Autumn | 7.7%                     | 0%    | 0%    | 7.7%  | 15.4% | 69.2% |
| Mussels          | 2                | Summer | 25.0%                    | 0%    | 16.7% | 0%    | 0%    | 58.3% |
|                  |                  | Autumn | 30.0%                    | 0%    | 0%    | 0%    | 10.0% | 60.0% |
|                  | 3                | Summer | 33.3%                    | 0%    | 0%    | 0%    | 0%    | 66.7% |
|                  |                  | Autumn | 8.3%                     | 16.7% | 0%    | 0%    | 0%    | 75.0% |
|                  | 4                | Summer | 23.1%                    | 0%    | 0%    | 0%    | 7.7%  | 69.2% |
|                  |                  | Autumn | 7.4%                     | 18.5% | 0%    | 0%    | 29.6% | 44.4% |
| Japanese oysters | 5                | Summer | 7.7%                     | 0%    | 38.5% | 0%    | 0%    | 53.8% |
|                  | 6                | Autumn | 25.0%                    | 6.3%  | 0%    | 0%    | 31.3% | 37.5% |
|                  | 1                | Summer | 0%                       | 8.3%  | 0%    | 8.3%  | 0%    | 83.3% |
|                  |                  | Autumn | 0%                       | 0%    | 0%    | 20.0% | 10.0% | 70.0% |
| Total            |                  |        | 13.6%                    | 7.1%  | 4.5%  | 3.2%  | 13.0% | 58.4% |

These percentages do not include known intrinsic resistances. AMX: amoxicillin; CHL: chloramphenicol; COL: colistin; CTX: cefotaxime; NAL: nalidixic acid; OTC: oxytetracycline.
